# Supplementary material for: Spatio-temporal assessment of the polychlorinated biphenyl (PCB) sediment contamination in four major French river corridors (1945–2018)
Source: Copernicus journal article supplement (doi:10.5194/essd-12-1153-2020), 2020-05-20
Supplement: Supplementary file 1 [file essd-12-1153-2020-supplement.zip]

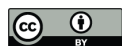

## *Supplement of*

# **Spatio-temporal assessment of the polychlorinated biphenyl (PCB) sediment contamination in four major French river corridors (1945–2018)**

**André-Marie Dendievel et al.**

*Correspondence to:* André-Marie Dendievel ([andre-marie.dendievel@entpe.fr](mailto:andre-marie.dendievel@entpe.fr))  
and Brice Mourier ([brice.mourier@entpe.fr](mailto:brice.mourier@entpe.fr))

- [essd-12-1153-2020-supplement-title-page.pdf](#)
- [Suppl. Fig. S1 - Comparison of PCB<sub>i</sub> distribution within the different matrix groups on each river.tif](#)
- [Suppl. Fig. S2 - Map of PCB<sub>i</sub> hotspots in the French Rivers \(1945-2018\).png](#)
- [Supplement Table S1 - Stations, time range and samples.xls](#)
- [Supplement Table S2 - Hydrological and human settings.xls](#)

The copyright of individual parts of the supplement might differ from the CC BY 4.0 License.
